# Supplementary material
Source: HighWire-hosted journal article supplement (https://erj.ersjournals.com/content/54/4/1900896)
Supplement: inline-supplementary-material-1 [file inline-supplementary-material-1.pdf]

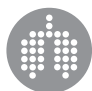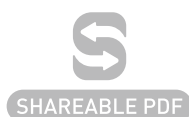

# Tuberculosis among asylum seekers in Milan, Italy: epidemiological analysis and evaluation of interventions

Simone Villa<sup>1</sup>, Luigi Ruffo Codecasa<sup>2</sup>, Marino Faccini<sup>3</sup>, Mirella Maria Pontello<sup>4</sup>, Maurizio Ferrarese<sup>2</sup>, Paola Francesca Castellotti<sup>2</sup>, Sabrina Senatore<sup>3</sup>, Anna Lamberti<sup>3</sup>, Ester Mazzola<sup>2</sup>, Carlo Federico Perno<sup>2</sup>, Daniela Campisi<sup>2</sup>, Matteo Saporiti<sup>2</sup> and Mario Carlo Raviglione<sup>5</sup>

**Affiliations:** <sup>1</sup>Dept of Health Sciences, University of Milan, Milan, Italy. <sup>2</sup>Regional TB Reference Centre, Villa Marelli Institute and Laboratory/ASST Niguarda, Milan, Italy. <sup>3</sup>Health Protection Agency, Metropolitan Area of Milan, Milan, Italy. <sup>4</sup>University of Milan, Milan, Italy. <sup>5</sup>Global Health Centre, University of Milan, Milan, Italy.

**Correspondence:** Mario Carlo Raviglione, Global Health Centre, University of Milan, Via Festa del Perdono, 7, 20122, Milan, Italy. E-mail: [mario.raviglione@unimi.it](mailto:mario.raviglione@unimi.it)

 @ERSpublications

Asylum seekers are vulnerable to TB owing to migration-related events and marginalisation in destination countries. Coordinated screening and surveillance programmes using well-informed datasets can reduce TB transmission, improve care and address LTBI. <http://bit.ly/2SPp0uZ>

**Cite this article as:** Villa S, Codecasa LR, Faccini M, *et al.* Tuberculosis among asylum seekers in Milan, Italy: epidemiological analysis and evaluation of interventions. *Eur Respir J* 2019; 54: 1900896 [<https://doi.org/10.1183/13993003.00896-2019>].

This single-page version can be shared freely online.

**ABSTRACT** In countries of the European Union, tuberculosis (TB) mainly affects marginalised people, including asylum seekers. Migratory flows from high-incidence countries to Italy have increased up to 2017, posing challenges to the national health system. This study sought to assess TB and latent TB infection (LTBI) prevalence among asylum seekers in Milan during the biennium 2016–2017 and to evaluate interventions in place.

A two-level active surveillance and screening system was developed for both TB and LTBI. Asylum seekers underwent an initial screening with a tuberculin skin test (TST) and a questionnaire at the receiving sites. At the Regional TB Reference Centre, those with a positive result underwent chest radiography. People aged <35 years with negative chest radiography results underwent further testing by interferon- $\gamma$  release assay. If results of the assay were positive, LTBI treatment was offered. TB and LTBI prevalence were compared with literature data.

A total of 5324 asylum seekers, mostly young (10–39 years; 98%), male (84%) and from sub-Saharan Africa (69%), were enrolled in the study. 69 active TB cases were diagnosed and 863 LTBI-positive individuals were detected. TB prevalence was high (1236 per 100 000 population) and LTBI prevalence was 28%. Despite losses (41%) during the transition from initial screening sites and the diagnostic centre, a good TB cure rate (84%) and optimal LTBI treatment completion (94%) were achieved.

Our study shows that TB incidence is high among asylum seekers in Milan and that well-coordinated screening measures are critical for early diagnosis and treatment. It also proves that rolling out successful at-scale interventions for both prophylaxis and disease management is feasible.
